# Supplementary material for: Pomegranate seed polyphenol-based nanosheets as an efficient inhibitor of amyloid fibril assembly and cytotoxicity of HEWL
Source: Royal Society of Chemistry journal article supplement (doi:10.1039/d1ra05820g), 2022-01-01

## Supplementary information

### Pomegranate Seed Polyphenol-based Nanosheets as an Efficient Inhibitor of Amyloid Fibril Assembly and Cytotoxicity of HEWL

Ali Akbar Meratan<sup>1</sup>, Vahid Hassani<sup>1</sup>, Atiyeh Mahdavi<sup>1</sup>, Nasser Nikfarjam<sup>2</sup>

<sup>1</sup> Department of Biological Sciences, Institute for Advanced Studies in Basic Sciences (IASBS), Zanjan 45137-66731, Iran.

<sup>2</sup> Department of Chemistry, Institute for Advanced Studies in Basic Sciences (IASBS), Zanjan 45137-66731, Iran.

**Figure S1.** The obtained powders of polyphenolic fraction of Pomegranate seed (PFPS) corresponding to (A) bulk and (B) nano forms. (C) Aqueous solution (2.5 mg mL<sup>-1</sup>) of bulk and nano forms of PFPS.

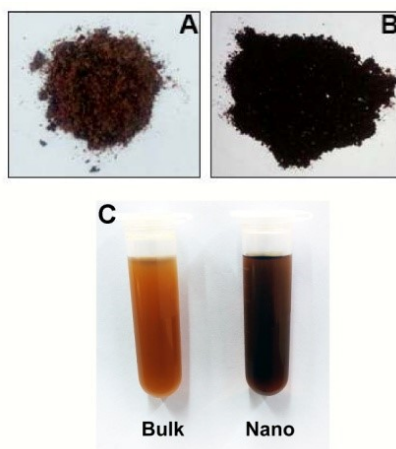

**Figure S2.** Fluorescence emission spectra of the bulk form of PFPS, excited at different wavelengths.

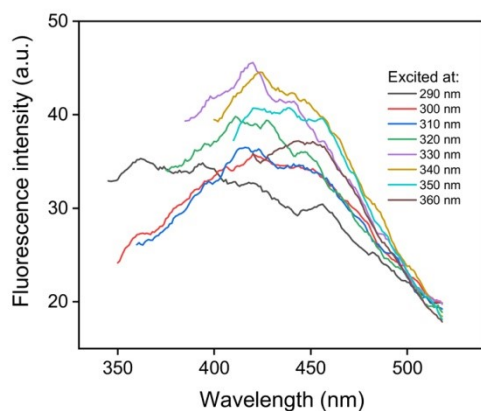

**Figure S3.** Fluorescence emission properties of (A) bulk and (B) nano forms of PFPS. Left-hand and right-hand y axes show fluorescence emission intensity and maximum emission wavelength of the bulk/nano forms of PFPS as a function of excited wavelength, respectively.

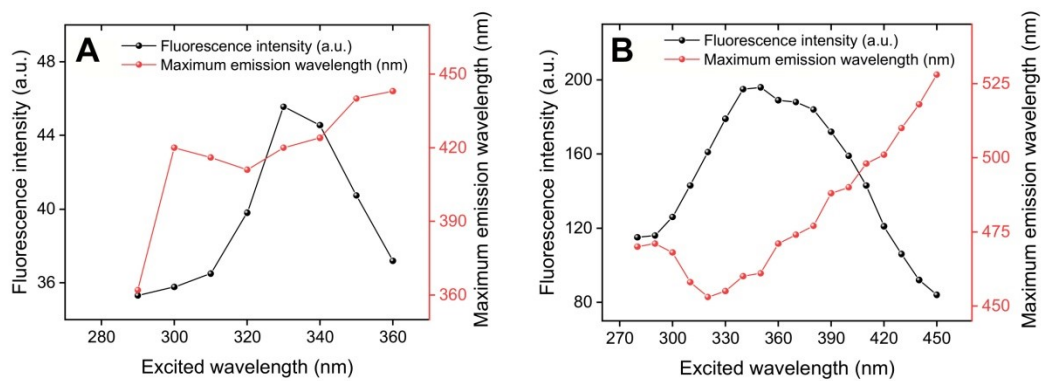

**Figure S4.** FT-IR spectra of the bulk and nano forms of PFPS.

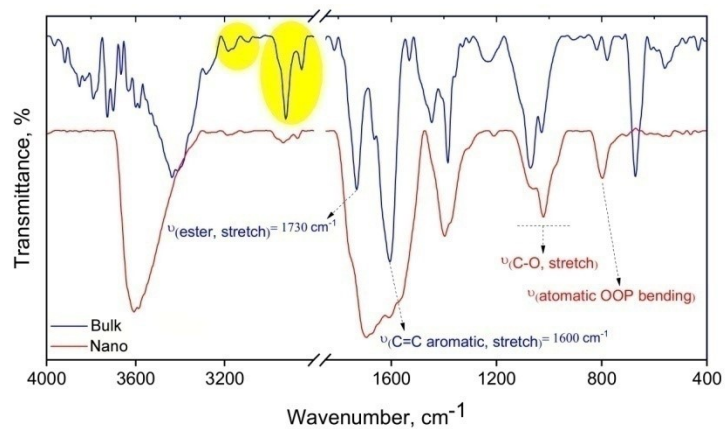

**Figure S5.** Surface zeta potential of PFPS nanosheets as a function of pH.

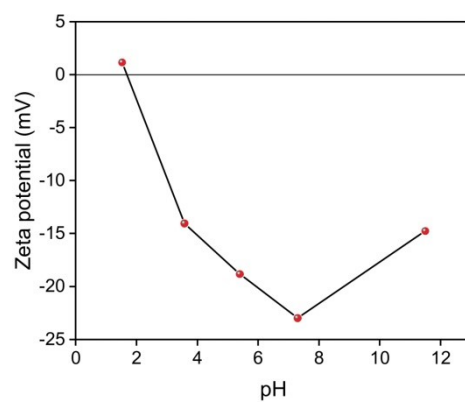

**Figure S6.** FE-SEM images of PFPS nanosheets. Due to the plenty of oxygen-based functional groups along with aromatic domains on the surface and sides of prepared nanoparticles, these structures are very susceptible to interact together, through hydrogen bonding and  $\pi$ - $\pi$  stacking, and form large aggregates.

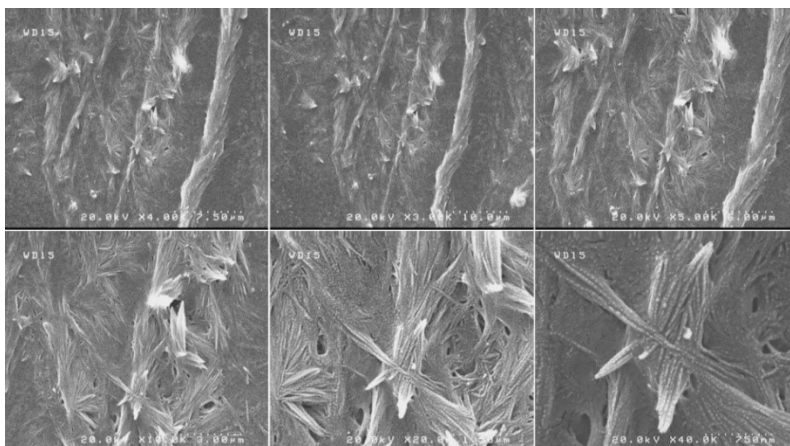

**Figure S7.** Congo red binding absorption spectra of HEWL in the absence and presence of various concentrations of (A) bulk or (B) nano forms of PFPS. (C) Quantification of Congo red binding.

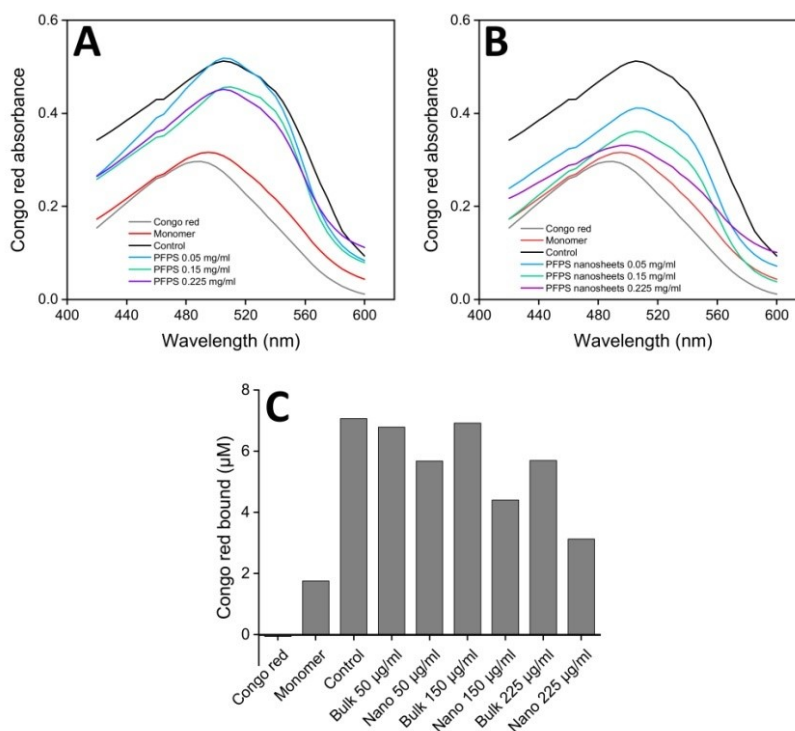

**Figure S8.** Dose-dependent toxicity of the bulk and nano forms of PFPS evaluated by MTT-based cell viability assay.

\* $p < 0.01$ , \*\* $p < 0.001$ , were significantly different from control cells.

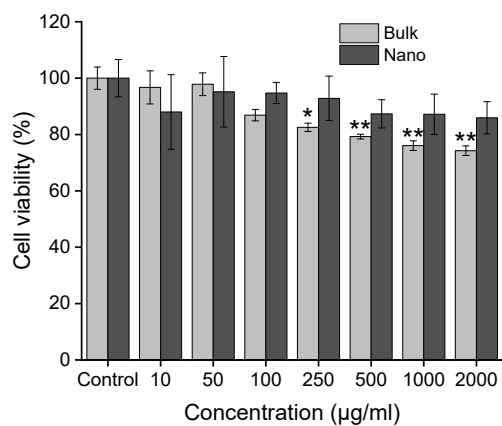

**Figure S9.** Dose-dependent toxicity of HEWL amyloid fibrils evaluated by MTT-based cell viability assay. \* $p < 0.01$ ,

\*\* $p < 0.001$ , were significantly different from control cells.

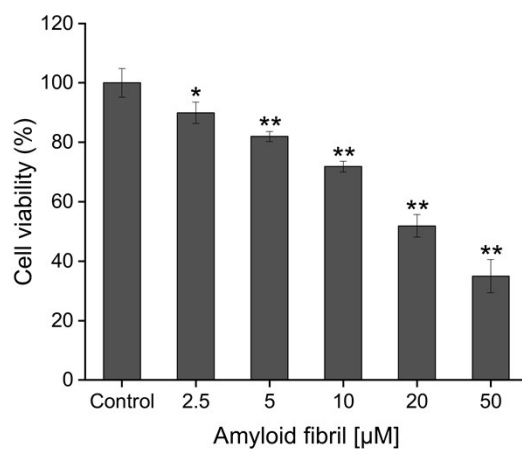

**Figure S10.** Dose-dependent hemolytic activity of the bulk and nano forms of PFPS. The percentage of hemolysis is calculated as percentage of the maximum observed upon treatment with Triton X-100 (1%). Low panels show optical microscopy images of samples incubated either alone (A) or with different concentrations of 50 (B), 150 (C), and 400 (D)  $\mu\text{g mL}^{-1}$  bulk, or 50 (E), 150 (F), and 400 (G)  $\mu\text{g mL}^{-1}$  nano forms of PFPS. (H) An enlarged view of (G). Arrows indicate the permeabilized cells.

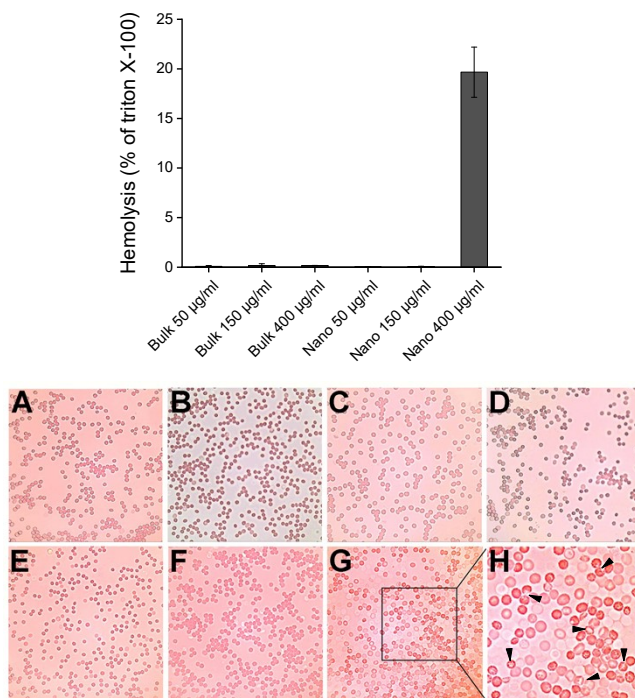

**Figure S11.** Dose-dependent hemolytic activity of HEWL amyloid fibrils. The percentage of hemolysis is calculated as percentage of the maximum observed upon treatment with Triton X-100 (1%). Inset shows erythrocyte aggregation induced by 50  $\mu$ M HEWL amyloid fibril.

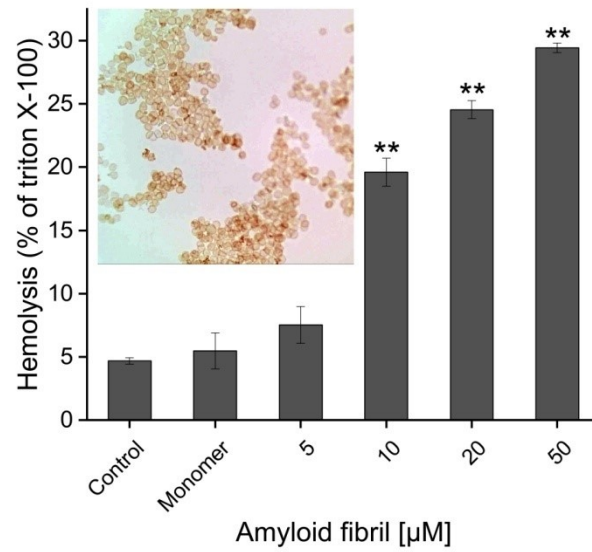

Supplement: d1ra05820g1.pdf [file d1ra05820g1.pdf]
